# Supplementary material
Source: PubMed Central journal article supplement (PMC3066478)

# Fig. S3

Q8D2C9\_WIGBRWigglesworthiaglossinidiabrevipalpis/1-538  
Q492Y2\_BLOPBCandidatusBlochmanniapennsylvanicusstrBPEN/1-552  
Q7VR96\_BLOFLBlochmanniafloridanus/1-548  
Q5QXP5\_IDILOIdiomarinaloiohiensis/1-545  
A3WKV0\_9GAMMidiomarinabalticaOS145/1-543  
Q023G7\_SOLUE/1-559  
Q0AE26\_NITEC/1-523  
A6Q9S1\_SULNBSulfurovumspNBC37-1/1-548  
A6Q3J7\_NITSBNitratoruptorspSB155-2/1-529  
A1A0B3\_BIFAABifidobacteriumadolescentisATCC15703/1-590  
Q5SLE0\_THET8ThermusthermophilusHB8/1-524  
thermophilum2Z0F/1-524  
A9DM45\_9GAMMSheWANellabenthicaKT99/1-556  
A6DH85\_9BACTLentisphaeraaraneosaHTCC2155/1-541  
Q31IA4\_DESDGDesulfovibriodesulfuricanssubspdesulfuricansstrG20/  
Q72C56\_DESVHDesulfovibriovulgarisstrHildenborough/1-551  
Q485E2\_COLP3Colwelliapsychrerythraea34H/1-553  
Q0RPE8\_FRAAAFrankiaalniACN14a/1-555  
Q6A8R3\_PROACPropionibacteriumacnes/1-543  
Q4JX32\_CORJKCorynebacteriumjeikeiumK411/1-551  
A5CNA0\_CLAM3AClavibactermichiganensissubspmichiganensis/1-546  
A4AG37\_9ACTNmarineactinobacteriumPHSC20C1/1-556  
Q6AH59\_LEIXXLeifsoniaaxylisubspxyl1/1-549  
Q5YR87\_NOCFANocardiafarcinica/1-562  
A7BAA5\_9ACTOuncharacterizedActinomycesodontolyticusATCC17982/1-  
A0JR62\_ARTS2ArthrobacterspFB24/1-549  
Q9ABY5\_CAUCRCaulobacteriovibrioides/1-545  
A4X5L5\_SALTOsalinisporatropicaCNB-440/1-549  
Q6NFK5\_CORDICorynebacteriumdiphtheriae/1-545  
Q0S2P7\_RHOSRRhodococcusjostiirHA1/1-561  
A3PX70\_MYCSJMycobacteriumspJLS/1-553  
A3KIY7\_STRAMStreptomycesambofaciensATCC23877/1-546  
A6W495\_KINRDKineococcusradiotoleransSRS30216/1-551  
A3TG97\_9MICOJanibacterspHTCC2649/1-554  
A1SQ50\_NOCSJNocardioidesspJS614/1-564  
A6VXA2\_MARMSMarinomonasspMWYL1/1-547  
A3Y826\_9GAMMMarinomonasspMED121/1-566  
A3EVC4\_9BACTLeptospirillumrubarum/1-547  
A4VS23\_PSEU5PseudomonasstutzeriA1501/1-554  
Q01ZL1\_SOLUECandidatusSolibacterusitatusEllin6076/1-549  
Q13N93\_BURXLBurkholderiaxenovoransLB400/1-552  
Q2YBU6\_NITMUNitrosospiramultiformisATCC25196/1-553  
Q3KCU4\_PSEPFSPseudomonasfluorescensPf0-1/1-548  
A1VVU1\_POLNAPolaromonasaphthalenivoransCJ2/1-553  
Q21ZC0\_RHOFDRhodoferraxferrireducensT118/1-559  
Q31E16\_THICRThiomicrospiracrunogenaXCL-2/1-547  
Q2C595\_9GAMMPPhotobacteriumspSKA34/1-548  
Q8KTX4\_VIBFIVibriofischeri/1-548  
Q7N6X8\_PHOLLPhotorhabdusluminescenssubspplumondii/1-546  
A9ZVW5\_YERPEYersiniapestisbiovarOrientalisstrF1991016/1-547  
P74643\_SYNY3SynecocystisPCC6803/1-567  
Q1IX64\_DEIGDDeinococcusgeothermalismDSM11300/1-547  
Q15TS2\_PSEA6PseudoalteromonasatlanticaT6c/1-549  
P38569\_Gluconacetobacterxylinus/1-555  
A5EE28\_BRASBPhosphomannomutase/1-546  
Q89GL1\_BRAJABradyrhizobiumjaponicum/1-564  
A9HSH5\_GLUDAGluconacetobacterdiazotrophicusPA15/1-553  
Q132H5\_RHOPSRhodopseudomonaspalustrisBisB5/1-550  
Q2LST5\_SYNASSyntrophusaciditrophicusSB/1-562  
Q3IGV2\_PSEHTPseudoalteromonashaloplanktisTAC125/1-545  
A4CCC3\_9GAMMPpseudoalteromonastunicataD2/1-546  
Q3A327\_PELCDPelobactercarbinolicusDSM2380/1-550  
Q21LB3\_SACD2Saccharophagusdegradans2-40/1-546  
A0KIH4\_AERHHAeromonashydrophilasubsphydrophilaATCC7966/1-549  
A1STA6\_PSYINPsychromonasingrahamii37/1-550  
Q47G38\_DECARDechloromonasaromaticaRCB/1-545  
A5G4W1\_GEOURGeobacteruraniireducensRF4/1-552  
Q21JG7\_ANADEAnaeromyxobacterdehalogenans2CP-C/1-546  
A7HB87\_ANADFAnaeromyxobacterspFw109-5/1-547  
A9G2L2\_SORCS3Sorangiumcellulosum/1-563  
Q6AL15\_DESPSDesulfotaleaapsyrophila/1-581  
Q1D2S8\_MYXXDMyxococcusxanthusDK1622/1-545  
Q08SD1\_STIAUSTigmatellaaurantiacaDW4/1-545  
stPGM2FUV/1-546

DANEIQKYYH  
NTSRLITQYYT  
NETKLIDQYYN  
NIAQLTISAYYV  
NIAQLVSAYYV  
DIDRLERTYFE  
MITTWLNAFY S  
NIPKLISAYYT  
DTAKLVSEYFY  
NVDEVIGKYYD  
EITRLTLTYE  
EITRLTLTYE  
NIPKLM SHYFC  
NIDELLLAYTD  
NIARLVSD FYT  
NIPALMG EYYT  
NIGQLVSDYFL  
DVALLLAAYD  
DVAVLVSAYHD  
DIPALLEAYSA  
DIDELIRAYHD  
DVPELVRAYYA  
DVALLRAYYE  
DIAHLVTAYFS  
NVDDV ISAYYD  
DLTALLDAYD  
DLALIGAYFE  
DVAMLVTAYYA  
DIAEVVTAYYT  
DIAHLVTAYYS  
DVAQVVTAYYA  
DVARLVVTAYYA  
DVAHVVTAYYA  
DLBHLVTAYYE  
DVAHLVTAYYT  
NLFELMSAYYL  
NIPALMTAYFC  
DIPRLVSAYFS  
HLPRLVARYYS  
DVPRLITAYYT  
NVPRLVASYIT  
NVPRLVTAAYT  
DIPRLVTAYYT  
DIQGLLAAYAD  
NVPKLITAYYC  
NIPKLM TDYYN  
NIPAL IANYFI  
NIPSLVAN YFL  
NVAQLT SQYYT  
NVAQLT SQYYV  
DVAKLDD Y YR  
NVPRLVAYYYE  
NVAQLT ISAYYS  
NIDALLDAYYT  
NIPRLITAYYA  
NIPRLVTAYFA  
DVAKLITAYYD  
NVPRLVTAAYFA  
NIPRLVSSYYT  
NVPKLVSAYYL  
NIPKLISAYYL  
NIPRLISDYIT  
NIPRLISEYYT  
NIPRLVSAYYL  
NIPKLISAYYL  
DIPDLRRYAS  
DIPDLRRYAA  
DIPDLKRAQYY S  
PCAKLRAAYAL  
DPEKLRAYFS  
HPETLRAQYY S  
NVAQLTAQYYV

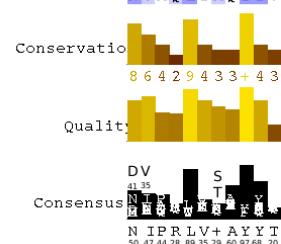

Supplement: NIHMS255812-supplement-Supp_Fig_02.pdf [file NIHMS255812-supplement-Supp_Fig_02.pdf]
