# Supplementary material
Source: PubMed Central journal article supplement (PMC3066478)
Supplement: NIHMS255812-supplement-Supp_tab_2.pdf [file NIHMS255812-supplement-Supp_tab_2.pdf]

**Supplementary Table 2.** Residues that form hydrogen bonds/salt bridges in the StPGM dimer interface

| <b>Chain A<br/>Residue [atom]</b> | <b>Chain B<br/>Residue [atom]</b> | <b>Distance<br/>(Å)</b> |
|-----------------------------------|-----------------------------------|-------------------------|
| Gln13 [NE2]                       | Val262 [O]                        | 3.17                    |
| Asn18 [ND2]                       | Glu92 [OE2]                       | 3.06                    |
| [OD1]                             | Gln264 [NE2]                      | 2.83                    |
| Val19 [N]                         | Gln264 [OE1]                      | 3.36                    |
| Ala20 [N]                         | Gln264 [OE1]                      | 2.92                    |
| Glu92 [OE2]                       | Asn18 [ND2]                       | 2.99                    |
| Gln261 [OE1]                      | Arg267 [NH1]                      | 2.84                    |
| Val262 [O]                        | Arg267 [NH1]                      | 3.14                    |
| [O]                               | Arg267 [NH2]                      | 3.03                    |
| [O]                               | Gln13 [NE2]                       | 3.11                    |
| Asp263 [OD2]                      | Arg267 [ NE ]                     | 3.31*                   |
| [OD1]                             | Arg267 [NH2]                      | 3.84*                   |
| [OD2]                             | Arg267 [NH2]                      | 3.53*                   |
| Gln264 [NE2]                      | Asn18 [OD1]                       | 2.91                    |
| [OE1]                             | Val19 [N]                         | 3.38                    |
| [OE1]                             | Ala20 [N]                         | 2.90                    |
| Arg267 [NH1]                      | Gln261 [OE1]                      | 2.84                    |
| [NH1]                             | Val262 [O]                        | 3.21                    |
| [NH2]                             | Val262 [O]                        | 3.10                    |
| [ NE ]                            | Asp263 [OD2]                      | 3.32*                   |
| [NH2]                             | Asp263 [OD1]                      | 3.80*                   |
| [NH2]                             | Asp263 [OD2]                      | 3.57*                   |

Contacts calculated by PISA<sup>60</sup>. Only contacts found between corresponding residues in both chain A and chain B were included. Asterisks indicate salt bridges, others contacts are hydrogen bonds.
