# Supplementary material
Source: PubMed Central journal article supplement (PMC3066478)
Supplement: NIHMS255812-supplement-Supp_tab_3.pdf [file NIHMS255812-supplement-Supp_tab_3.pdf]

**Supplementary Table 3. Conserved active site residues of StPGM with proposed functional roles**

| <b>Residue</b> | <b>Putative Role</b>                              | <b>% conservation</b> |
|----------------|---------------------------------------------------|-----------------------|
| R48            | General acid/base                                 | 99                    |
| T44            | Domain 1-4 latch                                  | 99                    |
| T511           |                                                   | 98                    |
| S146           | Phosphoserine involved in phosphoryl transfer (i) | 99                    |
| D304           | Metal binding ligands (ii)                        | 100                   |
| D306           |                                                   | 99                    |
| D308           |                                                   | 100                   |
| E390           | Sugar binding loop (iii)                          | 99                    |
| S392           |                                                   | 74 (A=24%)            |
| R507           | Phosphate binding site (iv)                       | 99                    |
| S509           |                                                   | 99                    |
| G510           |                                                   | 99                    |
| K516           |                                                   | 73 (R=26%)            |

Percentage conservation is calculated from a multiple sequence alignment of 416 PGM sequences derived from the PIR database (ref). The four conserved active site regions discussed in the text are indicated by (i-iv).
