# Supplementary material
Source: PubMed Central journal article supplement (PMC3066478)

# Supplementary Fig. S1

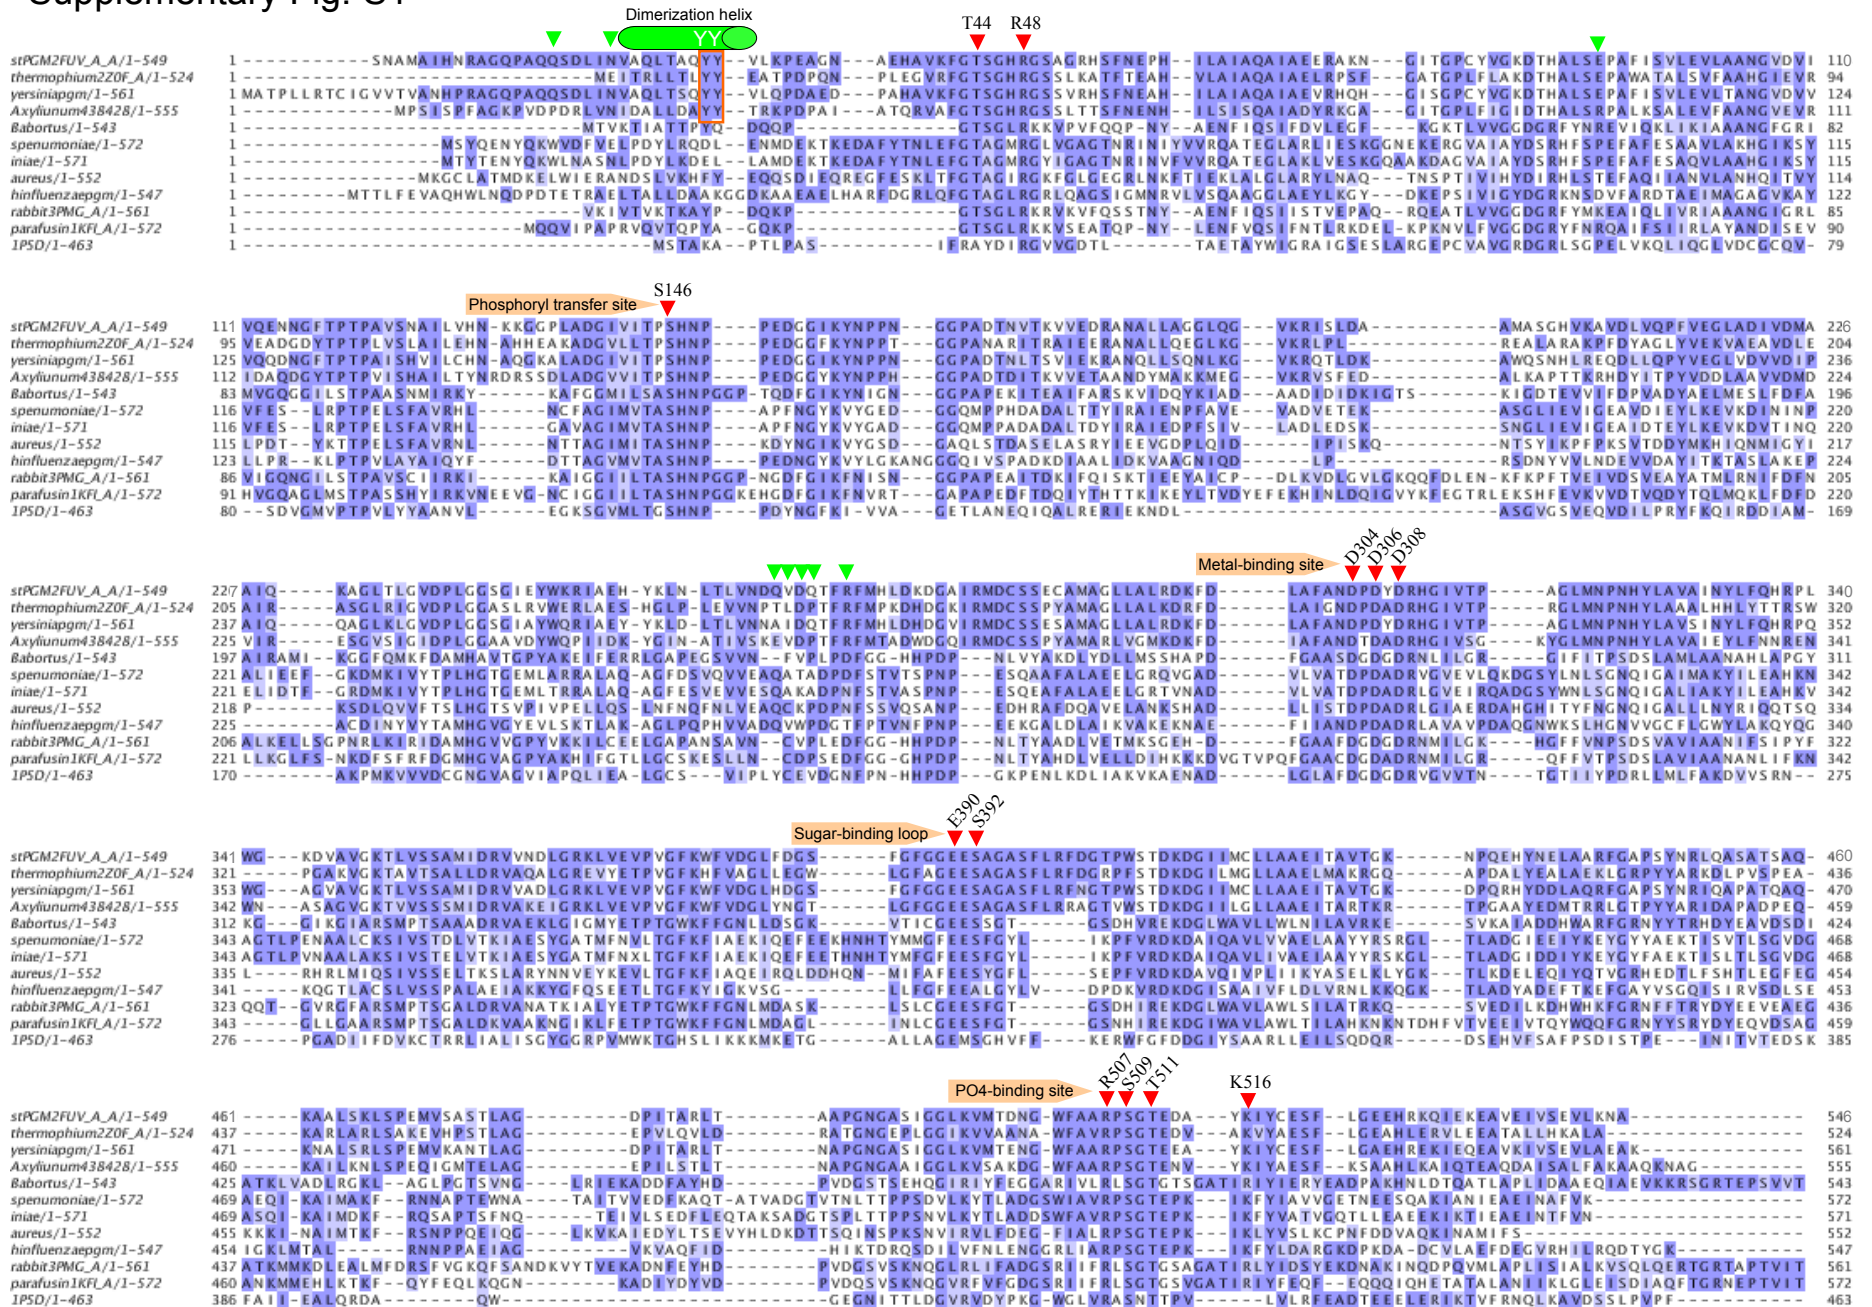

Supplement: NIHMS255812-supplement-Supp_Fig_01.pdf [file NIHMS255812-supplement-Supp_Fig_01.pdf]

Fig. S4

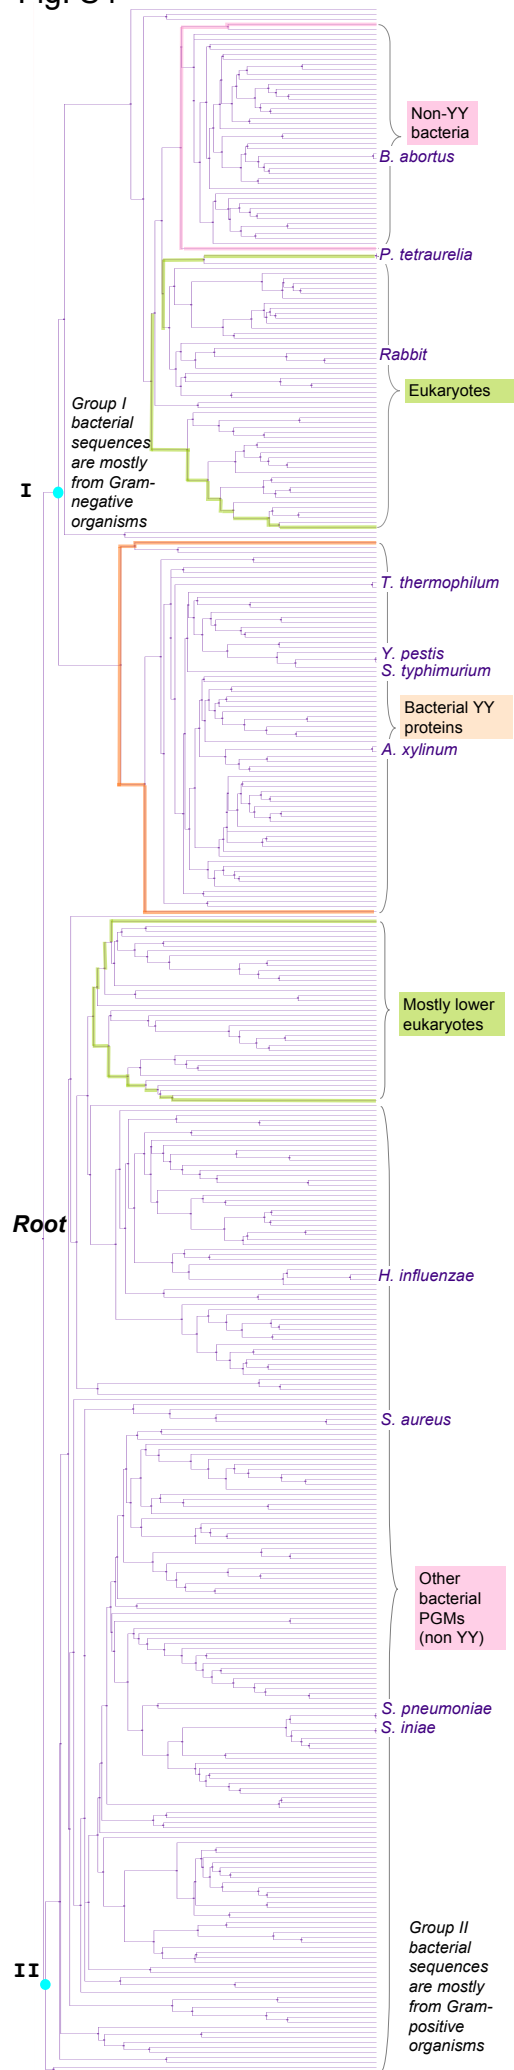

Supplement: NIHMS255812-supplement-Supp_Fig_04.pdf [file NIHMS255812-supplement-Supp_Fig_04.pdf]

Fig. S5

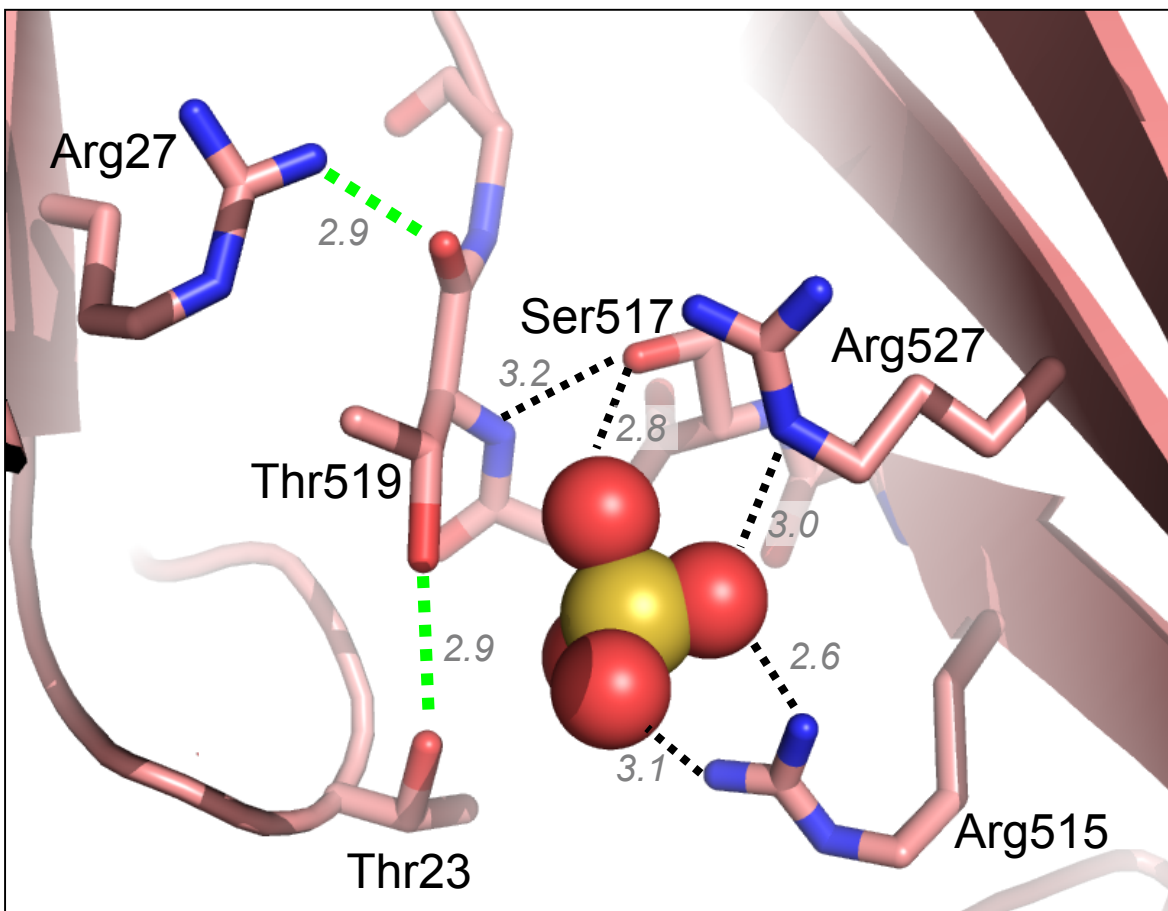

Supplement: NIHMS255812-supplement-Supp_Fig_05.pdf [file NIHMS255812-supplement-Supp_Fig_05.pdf]
